# Supplementary material for: A new FTIR method for estimating the firing temperature of ceramic bronze-casting moulds from early China
Source: PubMed Central journal article supplement (PMC7870837; doi:10.1038/s41598-021-82806-z), 2021-02-08
Supplement: 41598_2021_82806_MOESM1_ESM.pdf [file 41598_2021_82806_MOESM1_ESM.pdf]

# A new FTIR method for estimating the firing temperature of ceramic bronze-casting moulds from early China

Bichen Yan<sup>1,2</sup>, Siran Liu<sup>1\*</sup>, Chastain Matthew<sup>3</sup>, Shugang Yang<sup>4</sup>, Jianli Chen<sup>5</sup>

1 Institute for Cultural Heritage and History of Science & Technology, University of Science and Technology Beijing

2 Department of the History of Science, Tsinghua University

3 Department of Materials Science and Engineering, MIT

4 Henan Provincial Institute of Cultural Heritage and Archaeology

5 School of Archaeology and Museology, Peking University

\* Email: siran.liu@ustb.edu.cn

## Supplementary Information

**Supplementary Table S1. Mineralogical composition of two mould samples.**

| All phases  |        |        |            |      |  |  |
|-------------|--------|--------|------------|------|--|--|
| Sample      | Quartz | Albite | Microcline | Clay |  |  |
| H315②:57-30 | 57%    | 20%    | 9%         | 14%  |  |  |
| H315:58-5   | 46%    | 27%    | 12%        | 15%  |  |  |

  

| Clay minerals |                          |     |     |      |    |                        |
|---------------|--------------------------|-----|-----|------|----|------------------------|
| Sample        | Clay mineral composition |     |     |      |    | Mixed-layer ratio (S%) |
|               | It/S                     | It  | Kao | It/V | Pa | It/S                   |
| H315②:57-30   | 72%                      | 25% | 3%  | -    | -  | 40%                    |
| H315:58-5     | 52%                      | 40% | 5%  | 2%   | 1% | 40%                    |

It: Illite; Kao: Kaolinite; V: Vermiculite; Pa: Palygorskite; S: Smectite

**Supplementary Table S2. Chemical composition of all mould and core samples.**

| Sample                   | Type  | Na <sub>2</sub> O | MgO | Al <sub>2</sub> O <sub>3</sub> | SiO <sub>2</sub> | K <sub>2</sub> O | CaO | FeO |
|--------------------------|-------|-------------------|-----|--------------------------------|------------------|------------------|-----|-----|
| H315③:75-6               | mould | 1.6               | 1.0 | 12.3                           | 75.3             | 2.2              | 2.1 | 4.5 |
| H315③:75-2               | mould | 1.7               | 1.1 | 13.2                           | 74.9             | 2.9              | 1.5 | 4.4 |
| H315:20-6                | mould | 1.1               | Bdl | 12.3                           | 74.6             | 2.2              | 2.5 | 6.3 |
| H315:69-0                | mould | 2.1               | 1.4 | 13.4                           | 72.1             | 3.6              | 2.1 | 5.0 |
| H315:69-24               | mould | 2.0               | 1.1 | 12.5                           | 73.4             | 3.0              | 3.4 | 4.3 |
| H315:69-5                | mould | 1.7               | 1.1 | 14.9                           | 73.4             | 3.5              | 1.1 | 3.8 |
| H315:58-5                | mould | 2.0               | 1.1 | 15.7                           | 71.2             | 3.6              | 1.4 | 4.7 |
| H315:58-7                | mould | 1.9               | 1.2 | 14.5                           | 73.1             | 3.3              | 1.4 | 4.3 |
| H315②:57-30              | mould | 1.7               | 0.9 | 11.3                           | 75.1             | 1.7              | 2.7 | 4.3 |
| H315②:57-30-2            | mould | 2.0               | 1.0 | 16.0                           | 72.4             | 3.1              | 1.1 | 3.7 |
| <b>Average of moulds</b> |       | 1.8               | 1.1 | 13.6                           | 73.6             | 2.91             | 1.9 | 4.5 |
| H315:18-19               | core  | 1.0               | Bdl | 10.3                           | 80.6             | 2.2              | 1.2 | 4.7 |
| H315:7                   | core  | 2.1               | Bdl | 13.2                           | 75.6             | 2.7              | 1.4 | 4.5 |
| H315:18-23               | core  | 1.7               | Bdl | 10.7                           | 80.8             | 2.5              | 1.3 | 2.8 |
| H315:4-6                 | core  | 2.2               | 1.0 | 13.7                           | 74.7             | 2.9              | 1.6 | 3.5 |
| <b>Average of cores</b>  |       | 1.8               | 0.3 | 12.0                           | 77.9             | 2.6              | 1.4 | 3.9 |

**Supplementary Table S3. Estimated firing temperature ranges for all mould and core samples.**

| Sample        | Type  | FTIR qualitative analysis                          |                         | FTIR quantitative analysis (Absorptivity Ratio Method)        |                          |                         |                     |
|---------------|-------|----------------------------------------------------|-------------------------|---------------------------------------------------------------|--------------------------|-------------------------|---------------------|
|               |       | Observed FTIR absorption bands (cm <sup>-1</sup> ) | Firing temperature (°C) | Average absorptivity ratio (a <sub>S</sub> /a <sub>IS</sub> ) | Coefficient of variation | Firing temperature (°C) | Estimation approach |
| H315:69-24    | mould | 3624, 1035, 520                                    | <500                    | 0.5616                                                        | 8.33%                    | 200-300                 | CCA                 |
| H315:58-5     | mould | 3624, 1035, 520                                    | <500                    | 0.5614                                                        | 2.12%                    | 200-300                 | CCA                 |
| H315:69-5     | mould | 3624, 1035, 520                                    | <500                    | 0.5411                                                        | 2.76%                    | 200-300                 | CCA                 |
| H315:58-7     | mould | 3624, 1035, 520                                    | <500                    | 0.5344                                                        | 0.27%                    | 200-300                 | RA                  |
| H315②:57-30-2 | mould | 3624, 1035, 520                                    | <500                    | 0.5139                                                        | 3.96%                    | 200-300                 | RA                  |
| H315③:75-2    | mould | 3624, 1035, 520                                    | <500                    | 0.5133                                                        | 4.36%                    | 200-300                 | CCA                 |
| H315③:75-6    | mould | 3624, 1035, 520                                    | <500                    | 0.5073                                                        | 2.39%                    | 200-300                 | CCA                 |
| H315②:57-30   | mould | 3624, 1035, 520                                    | <500                    | 0.4373                                                        | 1.13%                    | 300-400                 | RA                  |
| H315:69-0     | mould | 3624, 1035, 520                                    | <500                    | 0.4362                                                        | 2.96%                    | 300-400                 | CCA                 |
| H315:20-6     | mould | 3624, 1035, 520                                    | <500                    | 0.4262                                                        | 3.64%                    | 300-400                 | CCA                 |
| H315:18-23    | core  | 3624, 1035, 520                                    | <500                    | 0.3934                                                        | 1.19%                    | 200-300                 | RA                  |
| H315:4-6      | core  | 1078, 1035                                         | 500-700                 | 0.3307                                                        | 5.91%                    | 500-600                 | RA                  |
| H315:18-19    | core  | 1078, 1035                                         | 500-700                 | 0.3268                                                        | 3.58%                    | 500-600                 | RA                  |
| H315:7        | core  | 1078                                               | 500-700                 | 0.3259                                                        | 1.32%                    | 500-600                 | CCA                 |

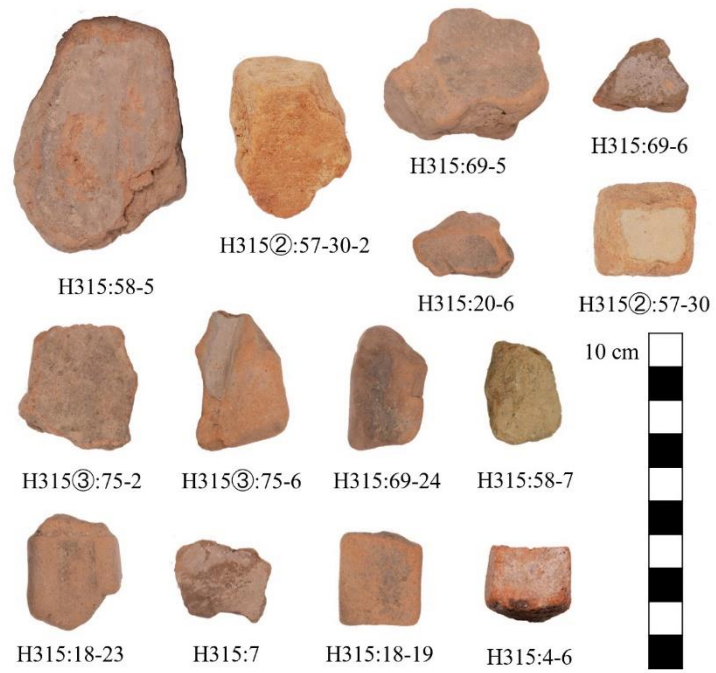

**Supplementary Figure S1. All bronze-casting mould and core artifacts analyzed in this study.**
